# Supplementary material
Source: MDPI journal article supplement (https://www.mdpi.com/2072-4292/12/3/447)
Supplement: s1 [file s1]

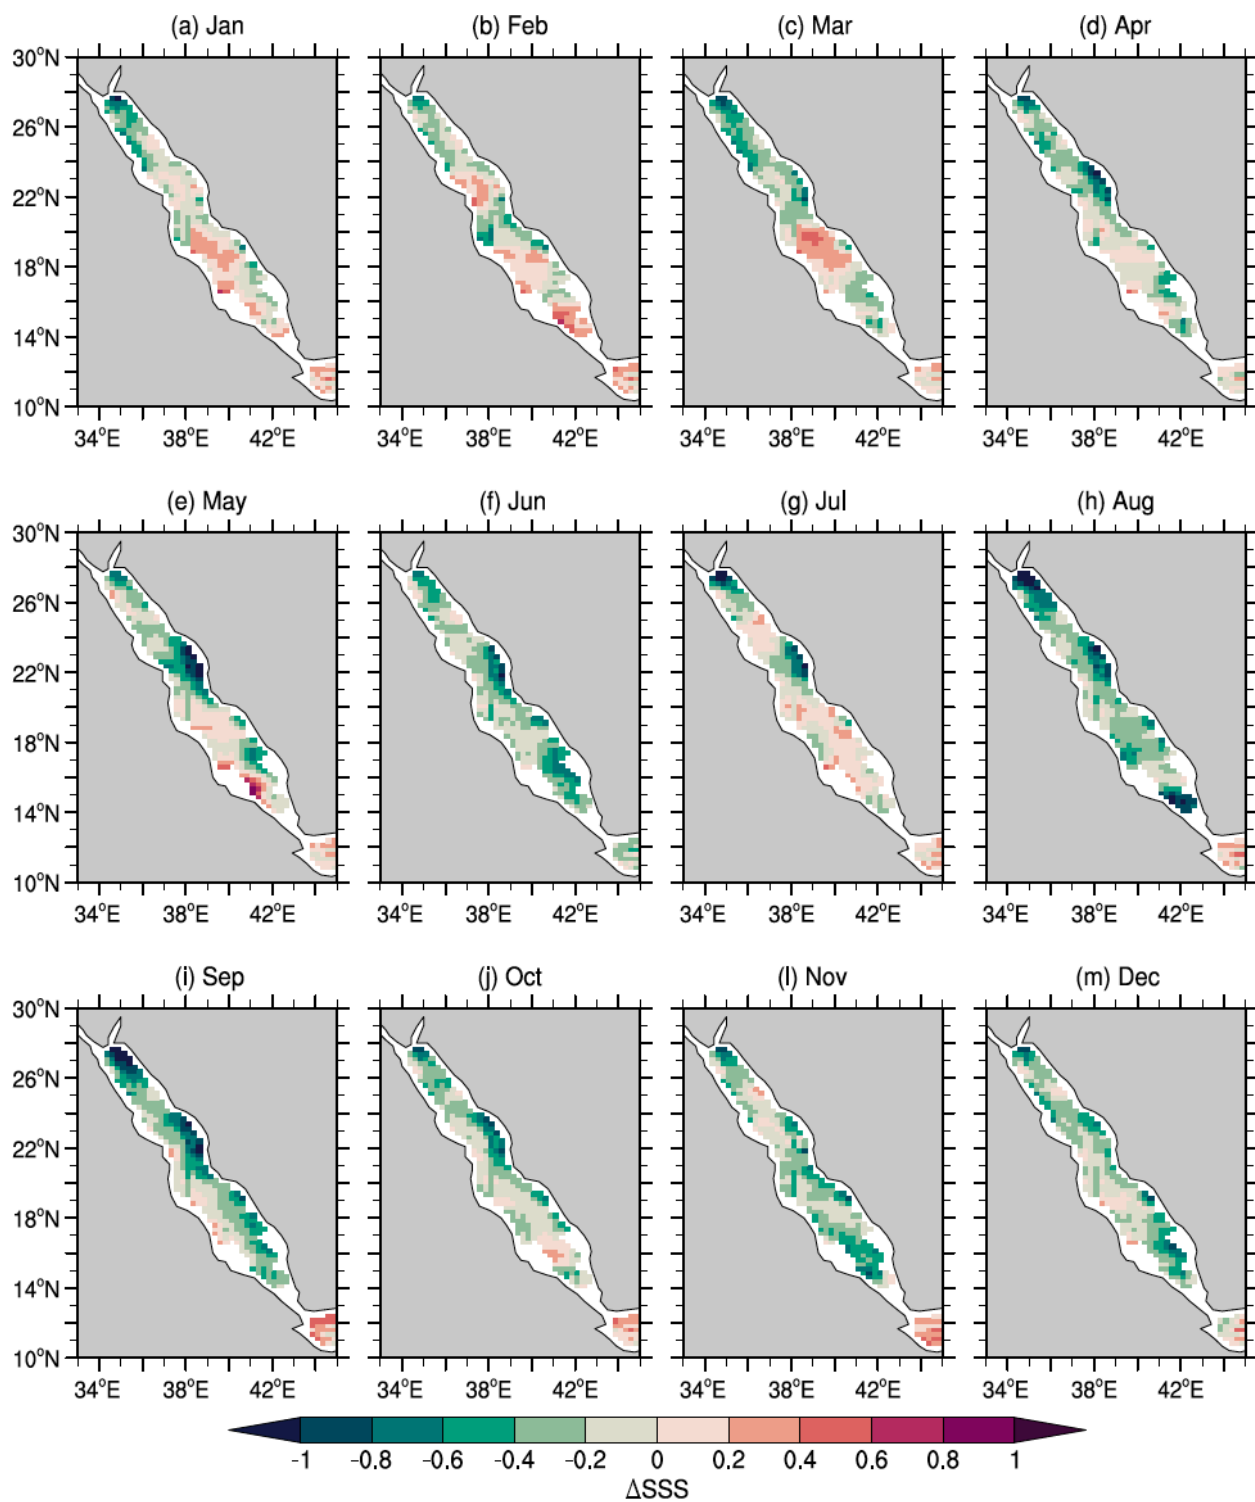

**Figure S1:** SSS difference (SMAP-WOA18) climatology in the Red Sea for L3 SMAP RSS-70 km

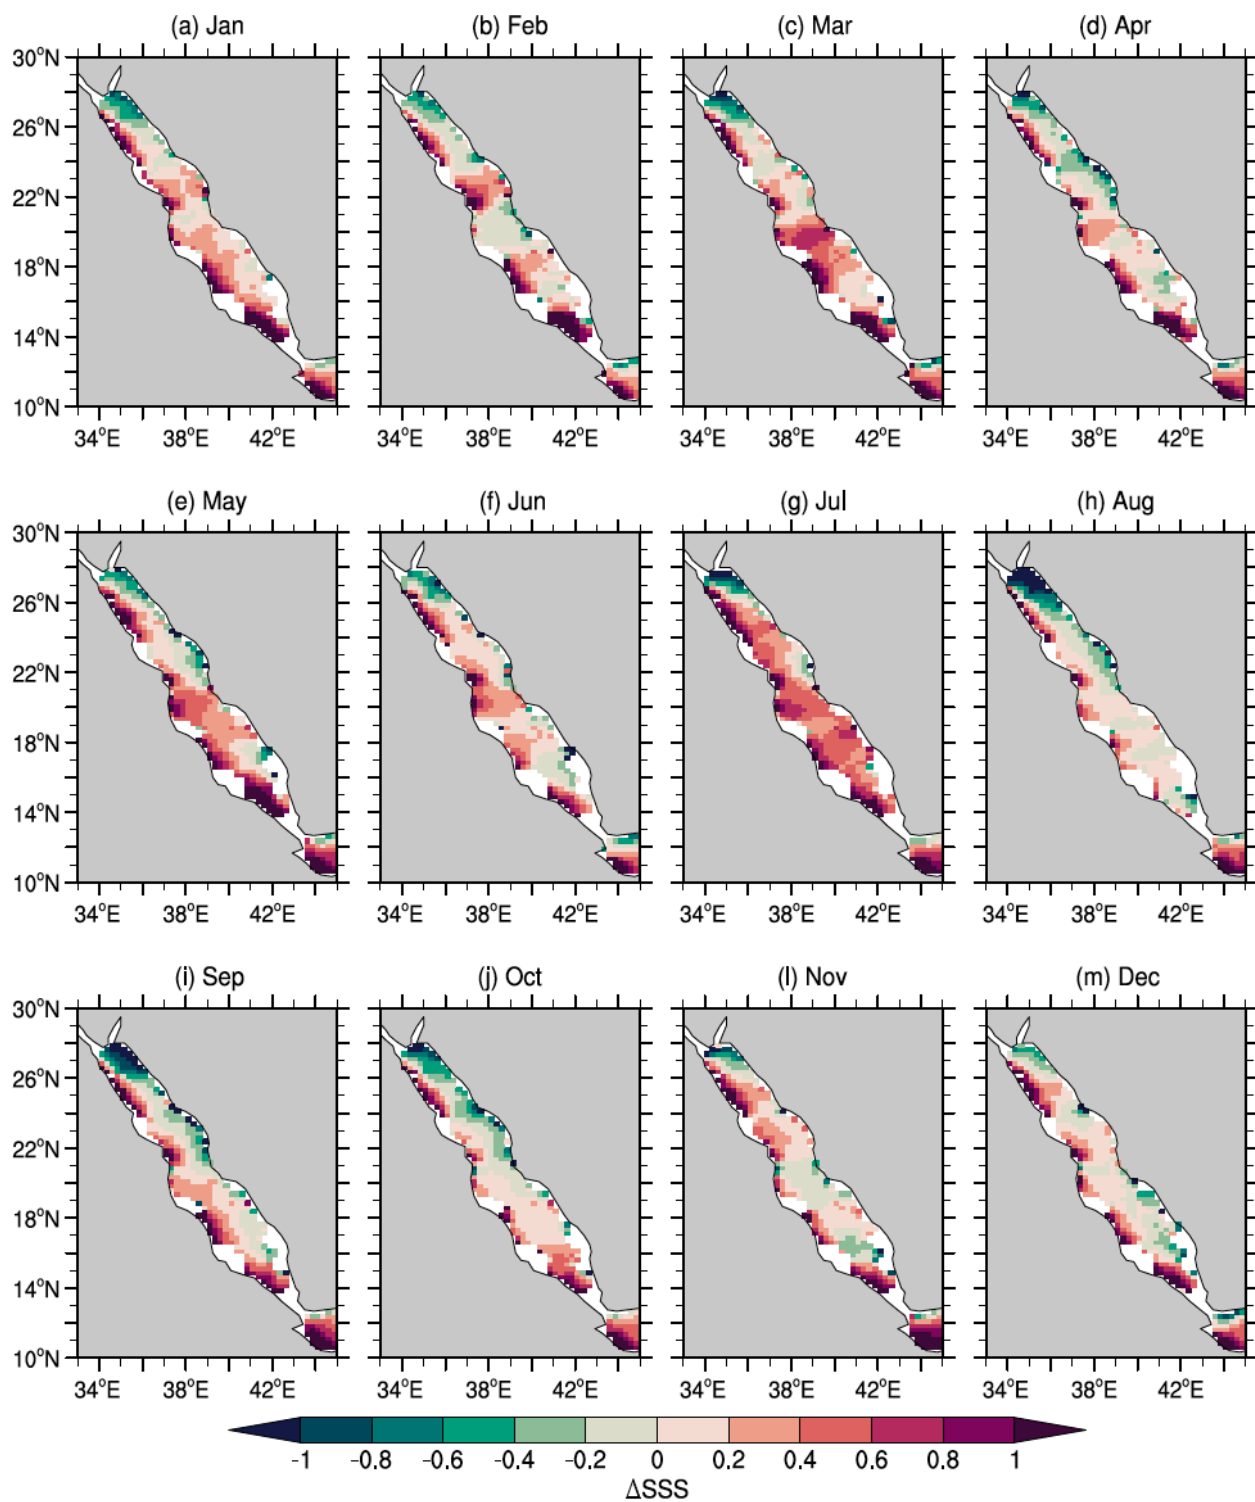

**Figure S2:** Same as S1 but for L3 SMAP CAP/JPL
